# Supplementary material for: Sexual selection, environmental robustness, and evolutionary demography of maladapted populations: A test using experimental evolution in seed beetles
Source: PubMed Central journal article supplement (PMC6691221; doi:10.1111/eva.12758), 2019-02-19

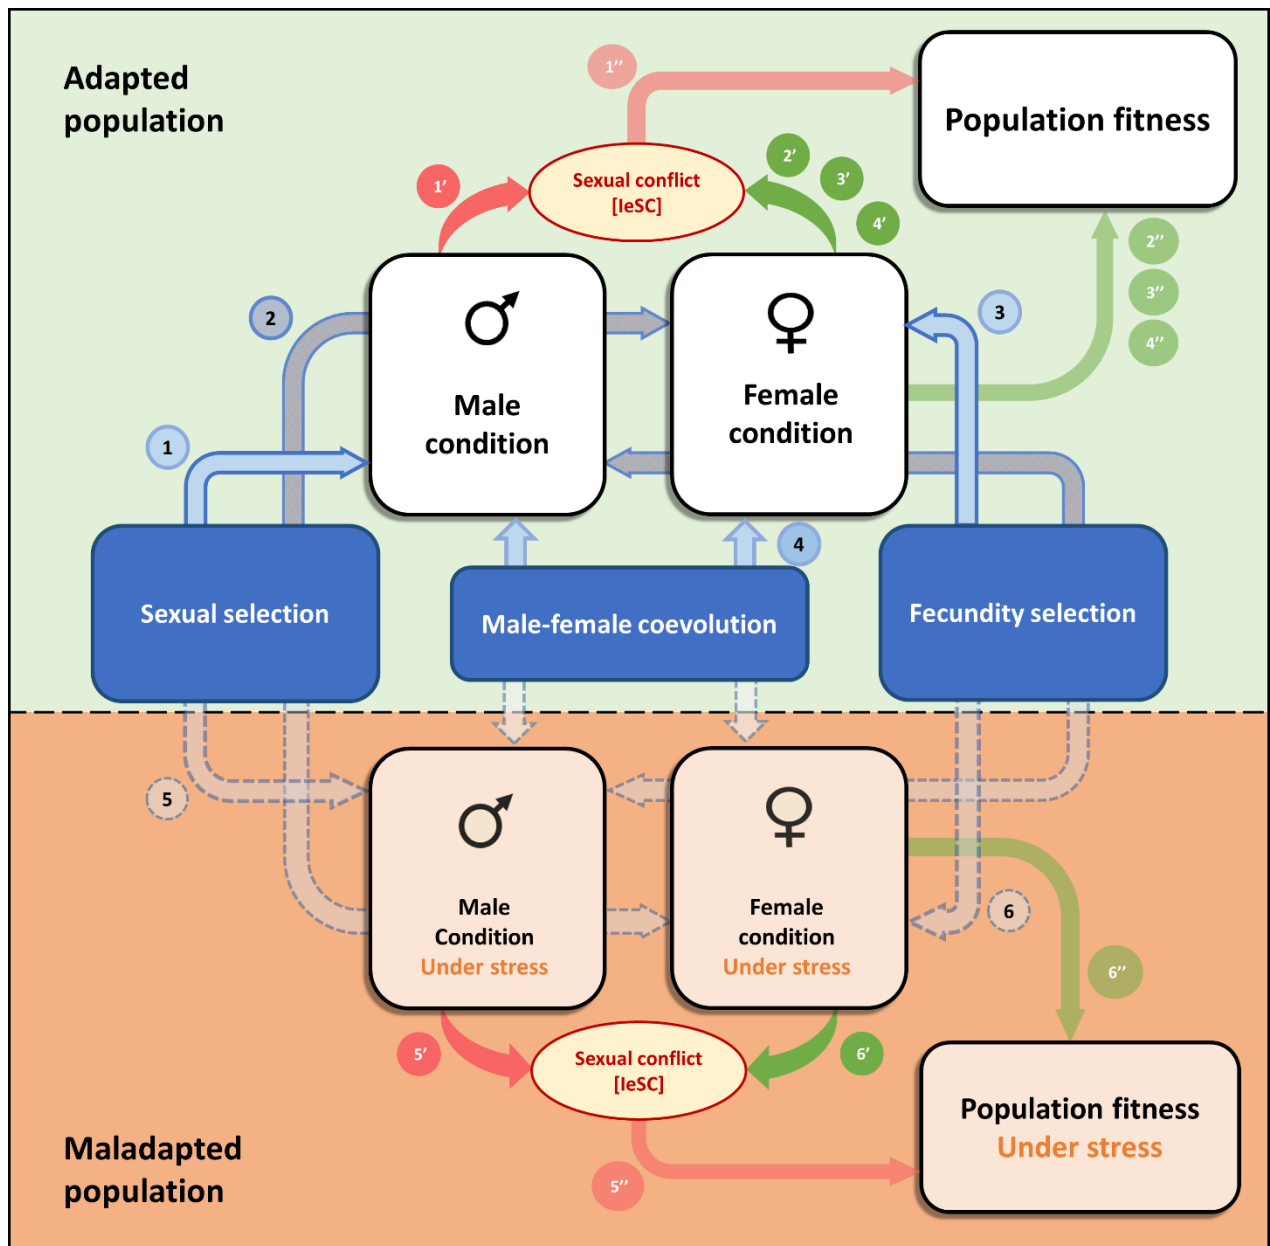

1

2 **Supplementary figure S1: Predicted effects of sexual selection, fecundity selection and**  
 3 **male-female coevolution on fitness of well-adapted and maladapted populations.**

4 Sexual selection, fecundity selection and male-female coevolution may all affect male and  
 5 female condition independently, modulating both the reproductive potential of each sex as well  
 6 as the intensity of interlocus sexual conflict (IeSC). These processes, and particularly the

7 resulting reproductive output of females, are expected to impact population fitness, but their  
8 dynamics could be modified upon rapid environmental change. Here we highlight some main  
9 scenarios for how individual-level selection on males and females is expected to affect  
10 population-level fitness.

11 **-In a well-adapted population (green panel):**

12 Sexual selection may increase male condition (1), resulting in intensified IeSC and reduced  
13 female fecundity (1') and population fitness (1''). It may also affect female condition (2), either  
14 positively by generally reducing mutation load, resulting in increased population fitness (2''),  
15 or negatively under pronounced intralocus sexual conflict (IaSC). Fecundity selection is  
16 expected to elevate female condition (3), which should increase population fitness (3'').  
17 Moreover, male-female coevolution (4) may allow females to evolve resistance to harmful male  
18 reproductive tactics, reducing the negative impact of IeSC on female fecundity (4') and  
19 population fitness (4'').

20 **-In a maladapted population (orange panel):**

21 A history of sexual selection and fecundity selection could either have favored individuals that  
22 are generally resistant to stress, resulting in improved condition also in the novel environment,  
23 or have favored locally adapted genotypes, resulting in those genotypes having low fitness in  
24 the novel environment (5, 6). In particular, how previous sexual selection in males (5) and  
25 fecundity selection in females (6) affects the expression of female condition in the novel  
26 environment is predicted to have direct consequences for population viability in maladapted  
27 populations (6''). While stress-resistant genotypes are predicted to result from purifying "good  
28 genes" sexual selection against deleterious mutations, genotype-by-environment interactions  
29 have often been observed for male reproductive traits, suggesting that sexual selection in one

30 environment may not necessarily result in increased condition in another. Moreover, if sexual  
31 selection and fecundity selection acts in fundamentally different ways to affect the expression  
32 of male ( $5'$ ) and female ( $6'$ ) condition in novel or stressful environments, this could lead to  
33 either an increased ( $5' > 6'$ ) or decreased ( $5' < 6'$ ) impact of IeSC on the viability of maladapted  
34 populations ( $5''$ ,  $6''$ ) as a result of changes in the relative condition of male and female  
35 genotypes.

36

37

38 **Supplementary table S2.** Output of the MCMCglmm model used to estimate the cost of  
 39 socio-sexual interactions. The response variable was number of offspring; evolution regime,  
 40 temperature and type of assay (population fitness or fertility assay) as well as their  
 41 interactions were specified as fixed effects. Evolution replicate, temperature by replicate and  
 42 assay type by replicate were specified as random effects.

43

| <b>Fixed Effect</b>          | <b>Posterior mean</b> | <b>95% CI</b> | <b>P<sub>MCMC</sub></b> |
|------------------------------|-----------------------|---------------|-------------------------|
| Intercept                    | 62.45                 | 56.03/68.27   | <0.001                  |
| Assay type: Fertility        | 15.73                 | 9.38/22.02    | <0.001                  |
| Selection: Monogamy          | -1.89                 | -12.17/7.06   | 0.67                    |
| Selection: Polygamy          | 0.98                  | -7.52/10.97   | 0.81                    |
| Temperature: 36C             | -11.7                 | -19.12/-3.99  | 0.01                    |
| Fertility by Monogamy        | -7.19                 | -16.64/1.87   | 0.13                    |
| Fertility by Polygamy        | -5.15                 | -15.31/3.31   | 0.25                    |
| Fertility by 36C             | -3.67                 | -11.85/4.76   | 0.38                    |
| Monogamy by 36C              | -0.59                 | -12.13/9.98   | 0.92                    |
| Polygamy by 36C              | 3.7                   | -7.10/15.51   | 0.46                    |
| Fertility by Monogamy by 36C | -0.71                 | -11.73/12.52  | 0.9                     |
| Fertility by polygamy by 36C | -5.65                 | -16.59/6.58   | 0.34                    |
| <b>Random effects</b>        |                       |               |                         |
| Evolution Replicate          | 5.92                  | 0.0031/21.0   |                         |
| Temperature by Replicate     | 7.76                  | 0.0034/29.1   |                         |
| Assay type by Replicate      | 1.75                  | 0.0035/8.0    |                         |
| Residuals                    | 182.2                 | 160.5/207.5   |                         |

44

**Posterior distributions of the cost of mating interactions****29C**

| Regime   | Posterior mode | Low 95% CI | High 95% CI |
|----------|----------------|------------|-------------|
| Male     | 0.19           | 0.13       | 0.28        |
| Monogamy | 0.13           | 0.037      | 0.2         |
| Polygamy | 0.14           | 0.063      | 0.21        |

**36C**

| Regime   | Posterior mode | Low 95% CI | High 95% CI |
|----------|----------------|------------|-------------|
| Male     | 0.19           | 0.094      | 0.26        |
| Monogamy | 0.089          | -0.021     | 0.19        |
| Polygamy | -0.008         | -0.082     | 0.12        |

**Temperatures pooled**

| Regime   | Posterior mode | Low 95% CI | High 95% CI |
|----------|----------------|------------|-------------|
| Male     | 0.2            | 0.14       | 0.25        |
| Monogamy | 0.11           | 0.031      | 0.17        |
| Polygamy | 0.095          | 0.017      | 0.15        |

**Selection regimes pooled**

| Temperature | Posterior mode | Low 95% CI | High 95% CI |
|-------------|----------------|------------|-------------|
| 29C         | 0.15           | 0.11       | 0.2         |
| 36C         | 0.11           | 0.041      | 0.15        |

| Overall cost | Posterior mode | Low 95% CI | High 95% CI |
|--------------|----------------|------------|-------------|
|              | 0.12           | 0.091      | 0.16        |

46

47 **Supplementary table S3.** Posterior distributions extracted from a MCMCglmm model for the  
 48 cost of socio-sexual interactions calculated as  $1 - B_{\text{population}} / B_{\text{monogamy}}$  where B represents mean  
 49 offspring production for population assays and fertility, assays respectively. Costs of socio-  
 50 sexual interactions are given for each evolution regime and temperature combination.

51

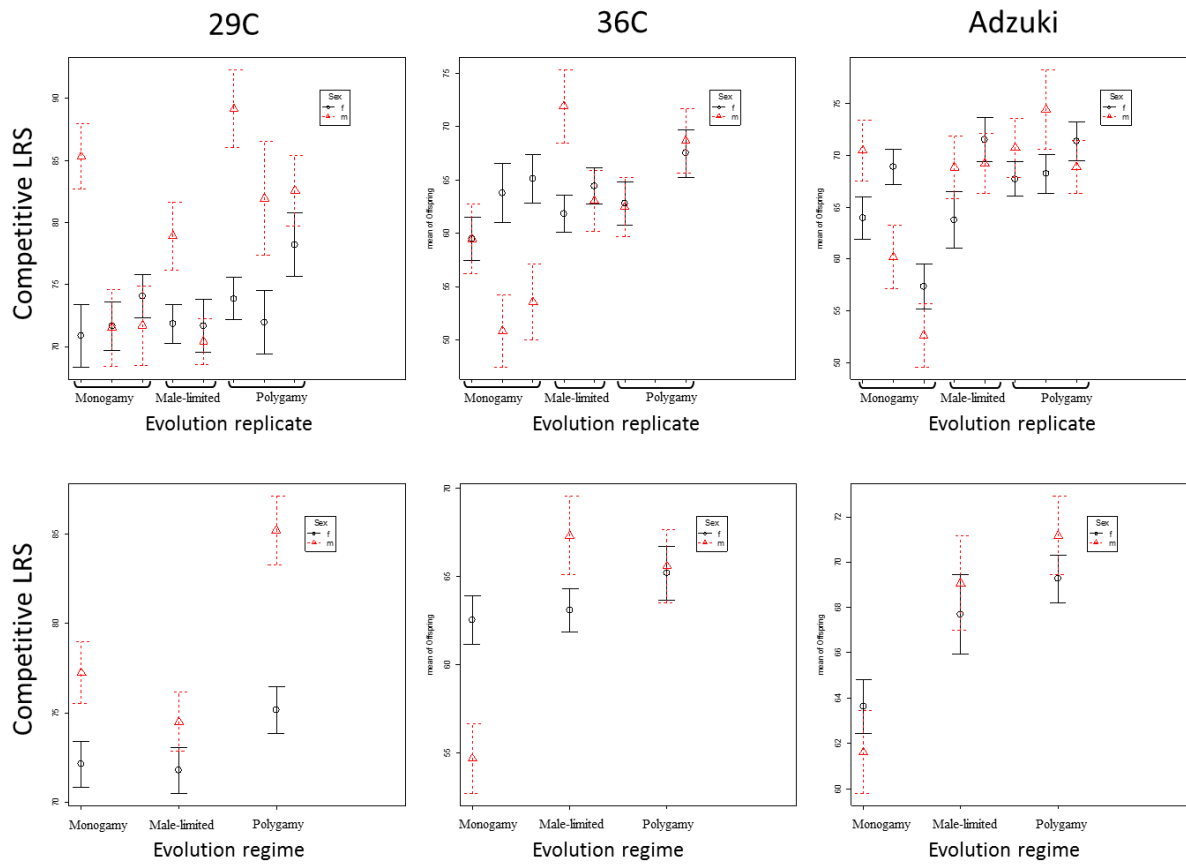

52

53

54 **Supplementary figure S4. Mean competitive LRS for each evolution regime (bottom**  
 55 **row) and each replicate line of the evolution regimes (upper row), for females (black**  
 56 **circles) and males (red triangles).**

57

58 **Supplementary table S5.** (a) Anova table for a general linear mixed-effect model of fertility,  
 59 showing the effect of assay temperature, evolution regime and ejaculate weight. P-values were  
 60 calculated using type II sums of squares.

61 (b) Anova table for a general linear mixed-effect model of fertility, showing the effect of assay  
 62 temperature, evolution regime and ejaculate weight together with female weight and male  
 63 weight. P-values were calculated using type II sums of squares.

64 **a.**

| <b>Fixed Effect</b>            | $\chi^2$ | <b>df</b> | <b>P-value</b> |
|--------------------------------|----------|-----------|----------------|
| Evolution regime               | 8.91     | 2         | 0.03           |
| Temperature                    | 39.5     | 1         | <0.001         |
| Ejaculate weight               | 0.07     | 1         | 0.79           |
| Temperature : Evolution regime | 0.08     | 2         | 0.96           |

65 **b.**

| <b>Fixed Effect</b>            | $\chi^2$ | <b>df</b> | <b>P-value</b> |
|--------------------------------|----------|-----------|----------------|
| Evolution regime               | 12       | 2         | 0.002          |
| Temperature                    | 84       | 1         | <0.001         |
| Ejaculate weight               | 0.19     | 1         | 0.67           |
| Female weight                  | 33       | 1         | >0.001         |
| Male weight                    | 0.64     | 1         | 0.42           |
| Temperature : Evolution regime | 0.59     | 2         | 0.75           |

66

67

68 **Supplementary figure S6. The relationship between female weight and fertility across**  
69 **temperatures and experimental evolution treatments.**

70

a)

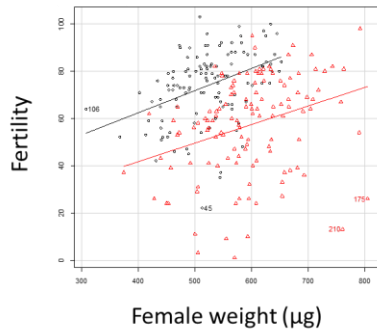

71

72

73

74

75

b)

Female weight ( $\mu\text{g}$ )

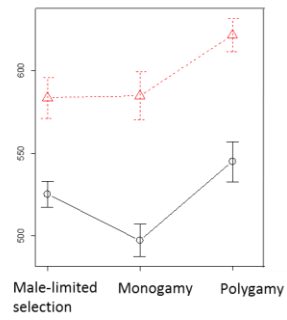

c)

Fertility

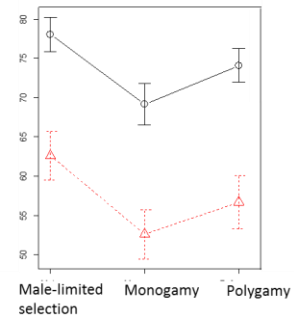

— 29°C  
— 36°C



76 **Supplementary table S7.a** Anova table for a general linear mixed-effect model on body  
 77 weight showing the effect of assay temperature, evolution regime, sex and their interactions.  
 78

| <b>Fixed Effect</b>                 | $\chi^2$ | <b>df</b> | <b>P-value</b> |
|-------------------------------------|----------|-----------|----------------|
| Evolution regime                    | 4.50     | 2         | 0.11           |
| Temperature                         | 35.2     | 1         | <0.001         |
| Sex                                 | 1117     | 1         | <0.001         |
| Temperature: Evolution regime       | 0.784    | 2         | 0.68           |
| Sex : Evolution regime              | 4.26     | 2         | 0.12           |
| Sex : Temperature                   | 2.15     | 1         | 0.14           |
| Sex : Temperature: Evolution regime | 0.0073   | 2         | 0.99           |

79 **Supplementary table S7.b** Anova table for a general linear mixed-effect model on male  
80 ejaculate weight, showing the effect of assay temperature, evolution regime, and their  
81 interactions.

| <b>Fixed Effect</b>           | <b><math>\chi^2</math></b> | <b>df</b> | <b>P-value</b> |
|-------------------------------|----------------------------|-----------|----------------|
| Evolution regime              | 1.13                       | 2         | 0.57           |
| Temperature                   | 0.083                      | 1         | 0.77           |
| Temperature: Evolution regime | 2.72                       | 2         | 0.26           |

82

83 **Supplementary table S7.c** Anova table for a generalized linear mixed-effect model on male  
84 activity, assuming Binomial errors, showing the effect of assay temperature, evolution regime  
85 and their interactions.

| <b>Fixed Effect</b>           | <b><math>\chi^2</math></b> | <b>df</b> | <b>P-value</b> |
|-------------------------------|----------------------------|-----------|----------------|
| Evolution regime              | 2.01                       | 2         | 0.37           |
| Temperature                   | 5.80                       | 1         | 0.016          |
| Temperature: Evolution regime | 0.151                      | 2         | 0.93           |

86

87 **Supplementary figure S8. The effect of temperature and evolution regime on female and**  
88 **male body weight.**

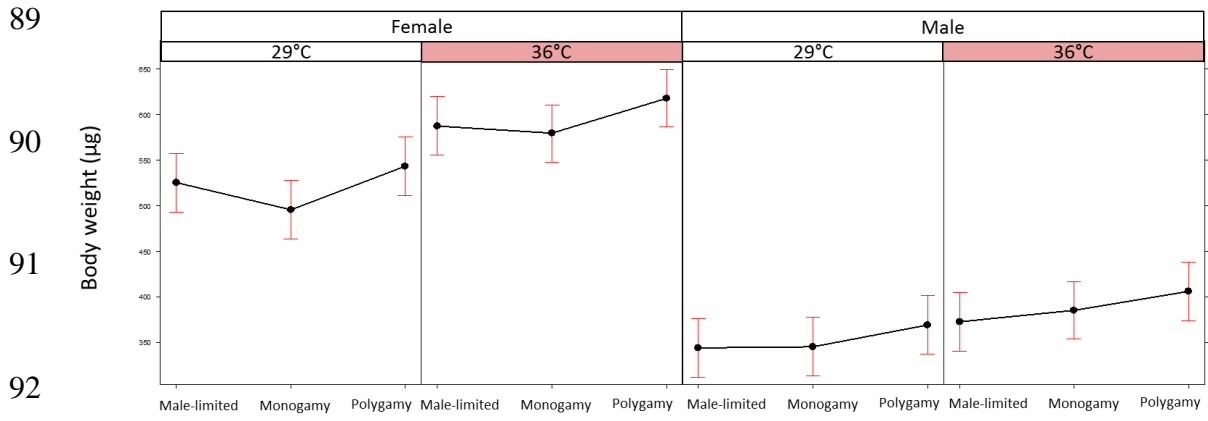

94 **Supplementary table S9.** Anova table for a general linear mixed-effect model on population  
95 fitness, showing the effect of assay temperature, evolution regime and their interactions.

| <b>Fixed Effect</b>           | <b><math>\chi^2</math></b> | <b>df</b> | <b>P-value</b> |
|-------------------------------|----------------------------|-----------|----------------|
| Evolution regime              | 5.24                       | 2         | 0.073          |
| Temperature                   | 115                        | 1         | <0.001         |
| Temperature: Evolution regime | 3.41                       | 2         | 0.18           |

96

97

98 **Supplementary figure S10. The effect of temperature and evolution regime on male**  
99 **activity.**

100

101

102

103

104

105

106

107

108

109

110

111

112

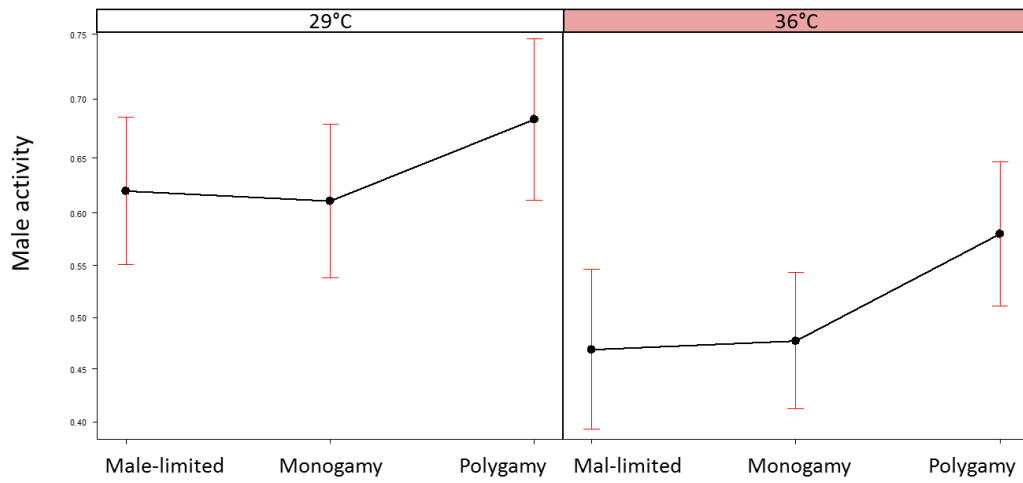

Supplement: EVA-12-1371-s001.pdf [file EVA-12-1371-s001.pdf]
